# Supplementary material for: Myeloid MyD88 restricts CD8+ T cell response to radiation therapy in pancreatic cancer
Source: PubMed Central journal article supplement (PMC10224952; doi:10.1038/s41598-023-35834-w), 2023-05-27
Supplement: 41598_2023_35834_MOESM1_ESM.pdf [file 41598_2023_35834_MOESM1_ESM.pdf]

## SUPPLEMENTAL INFORMATION

### **Myeloid MyD88 restricts CD8<sup>+</sup> T cell response to radiation therapy in pancreatic cancer**

Terry R. Medler<sup>1</sup>, Tiffany C. Blair<sup>1,2</sup>, Alejandro F. Alice<sup>1</sup>, Alexa K. Dowdell<sup>1</sup>, Brian D. Piening<sup>1</sup>, Marka R. Crittenden<sup>1,3</sup>, Michael J. Gough<sup>1,\*</sup>

**A**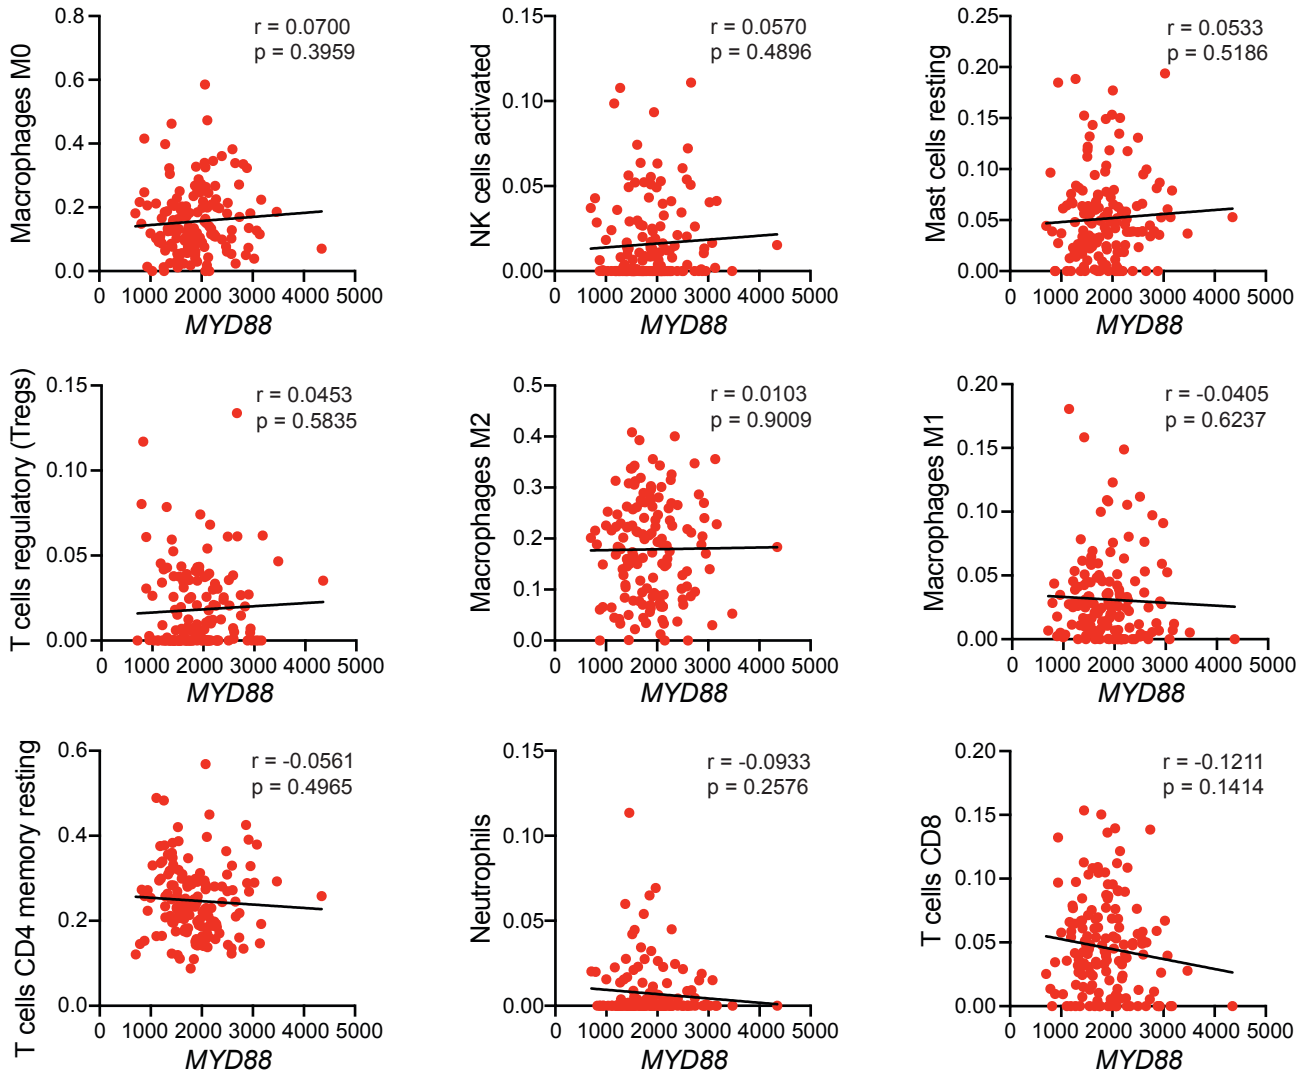**B**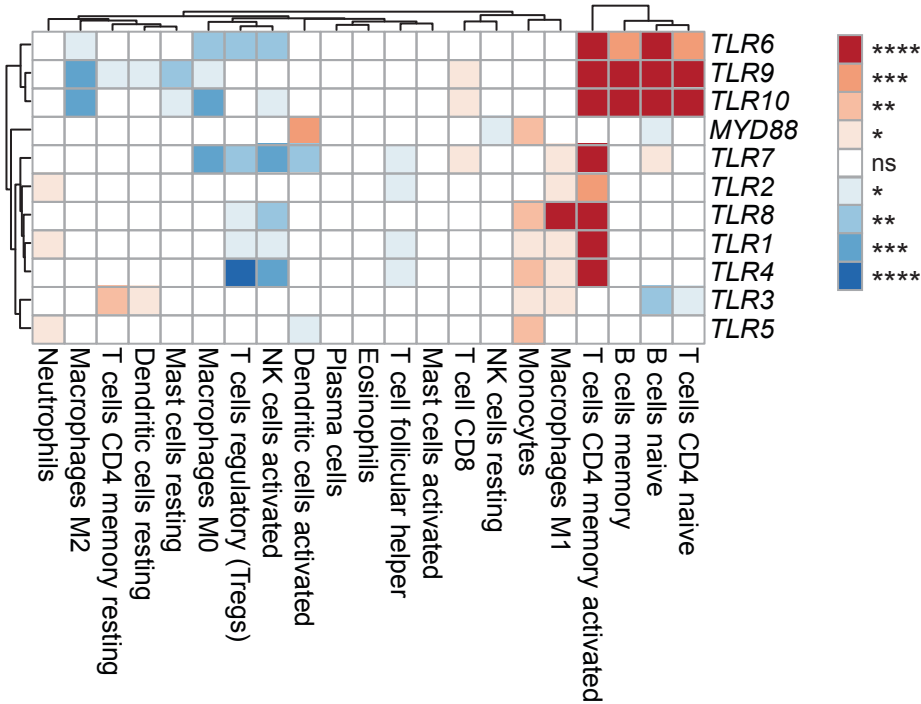

**Supplemental Figure S1. *MYD88* and *TLR* expression in human pancreatic cancer.**

**(A)** Linear regression analysis showing Pearson correlation between *MYD88* expression and inferred presence of indicated immune subsets as estimated by CIBERSORT in the PAAD TCGA dataset (n = 149). **(B)** Heatmap of p values for linear regression analysis of *TLR* and *MYD88* expression with presence of immune subsets as inferred by CIBERSORT in the PAAD TCGA dataset (n = 149). Positive p values are indicated in shades of red, while negative p values appear in blue. Data were visualized using ClustVis. See **Figure 1C** for Pearson correlation values.

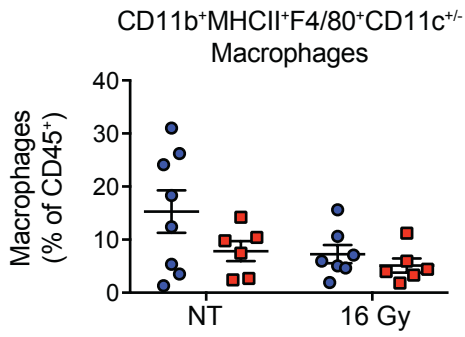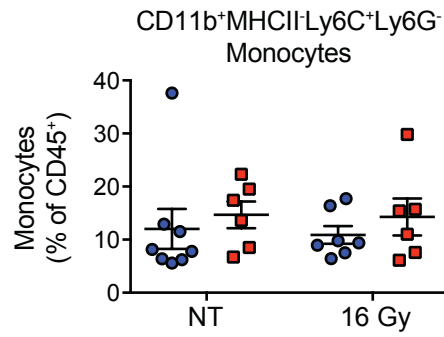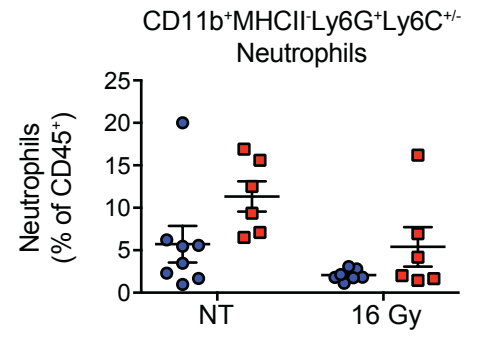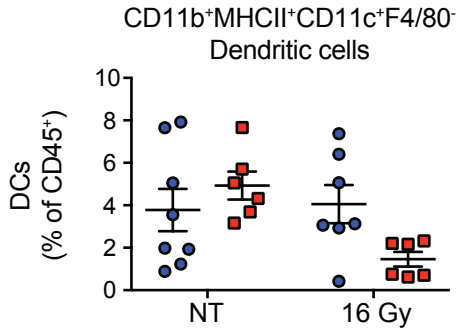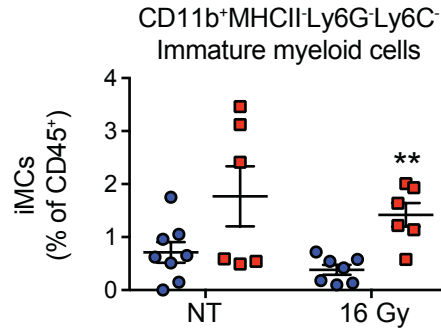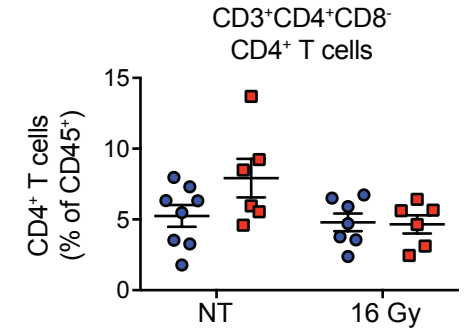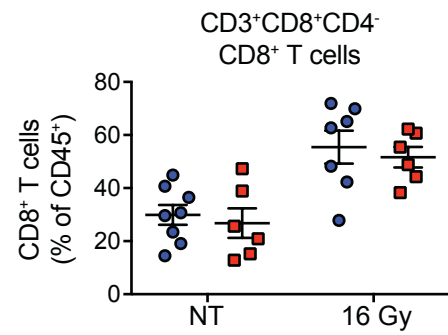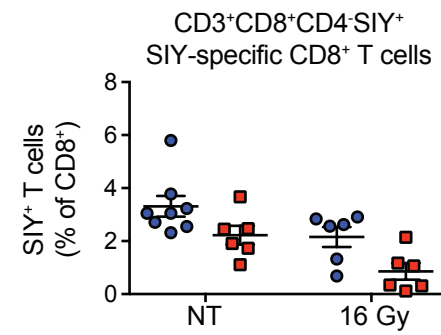

● *Myd88<sup>fl/fl</sup>*  
■ *Lyz2-cre/Myd88<sup>fl/fl</sup>*

**Supplemental Figure S2. Infiltrating immune cells are largely unchanged in *Lyz2-Cre/Myd88<sup>fl/fl</sup>* mice.**

Flow cytometric analysis of Panc02-SIY tumors isolated 7d post-RT using the indicated markers, represented as a percentage of live CD45<sup>+</sup> cells. Each data point represents a single mouse (n = 6-8 mice per group). Significant differences between genotypes were determined by multiple t tests corrected using the Holm-Sidak method, with \*\* p < 0.01.

*Cd19*

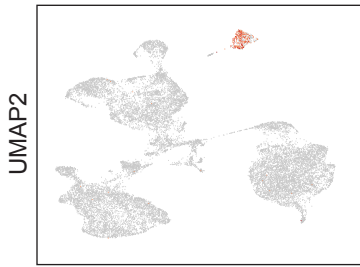

*Cd3e*

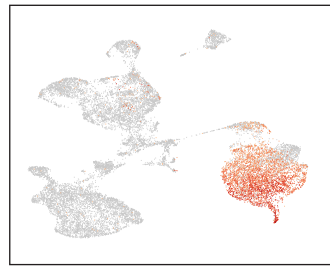

*Cd4*

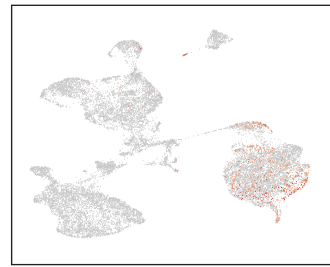

*Foxp3*

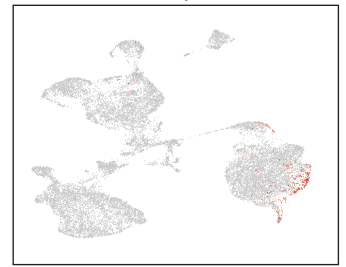

*Cd8a*

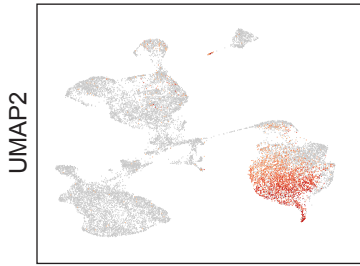

*Klrb1c*

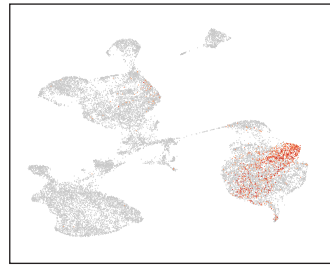

*Zbtb46*

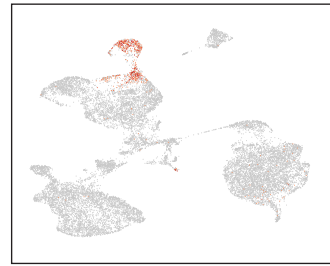

*Itgax*

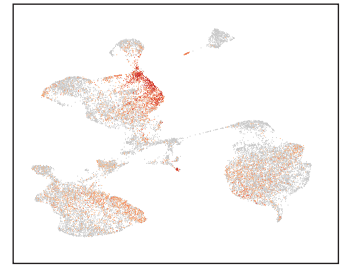

*Itgam*

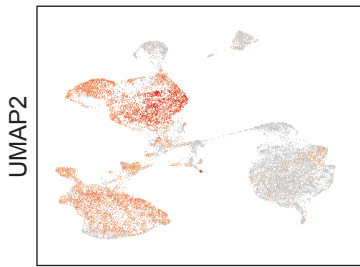

*Csf1r*

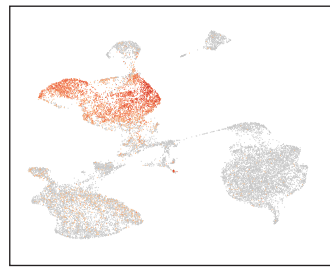

*Adgre1*

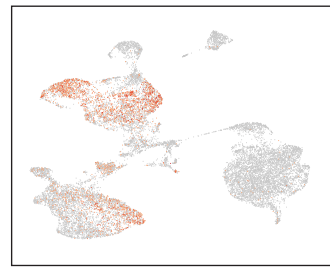

*Ccr2*

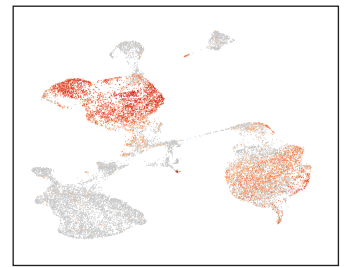

*Cx3cr1*

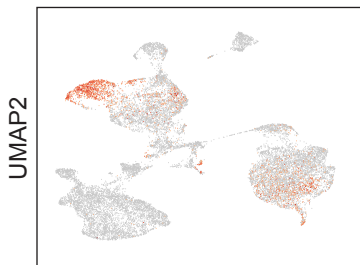

*Ly6c2*

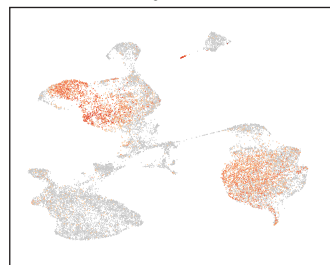

*Csf3r*

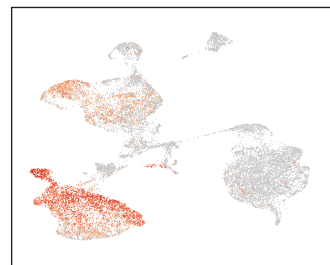

*Siglecf*

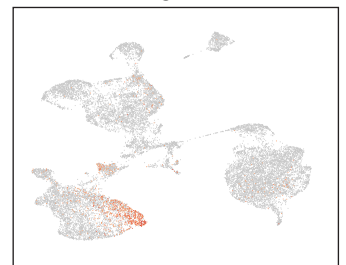

*Ccr3*

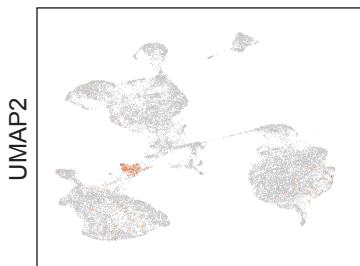

*Fcer1*

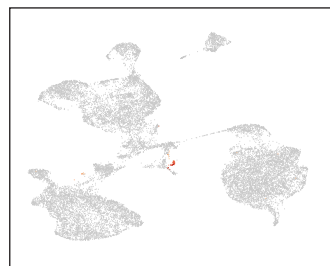

**Supplemental Figure S3. Expression of lineage markers used to identify dominant immune populations in scRNAseq.**

scRNAseq was performed on CD45<sup>+</sup> cells isolated from untreated tumors or 3d post-RT in *Lyz2-Cre/Myd88<sup>fl/fl</sup>* mice and *Myd88<sup>fl/fl</sup>* mice. Expression of indicated genes in UMAP is shown (see also **Figure 3 and Supplemental Figure S4**), with the intensity of red directly proportional to the degree of expression.

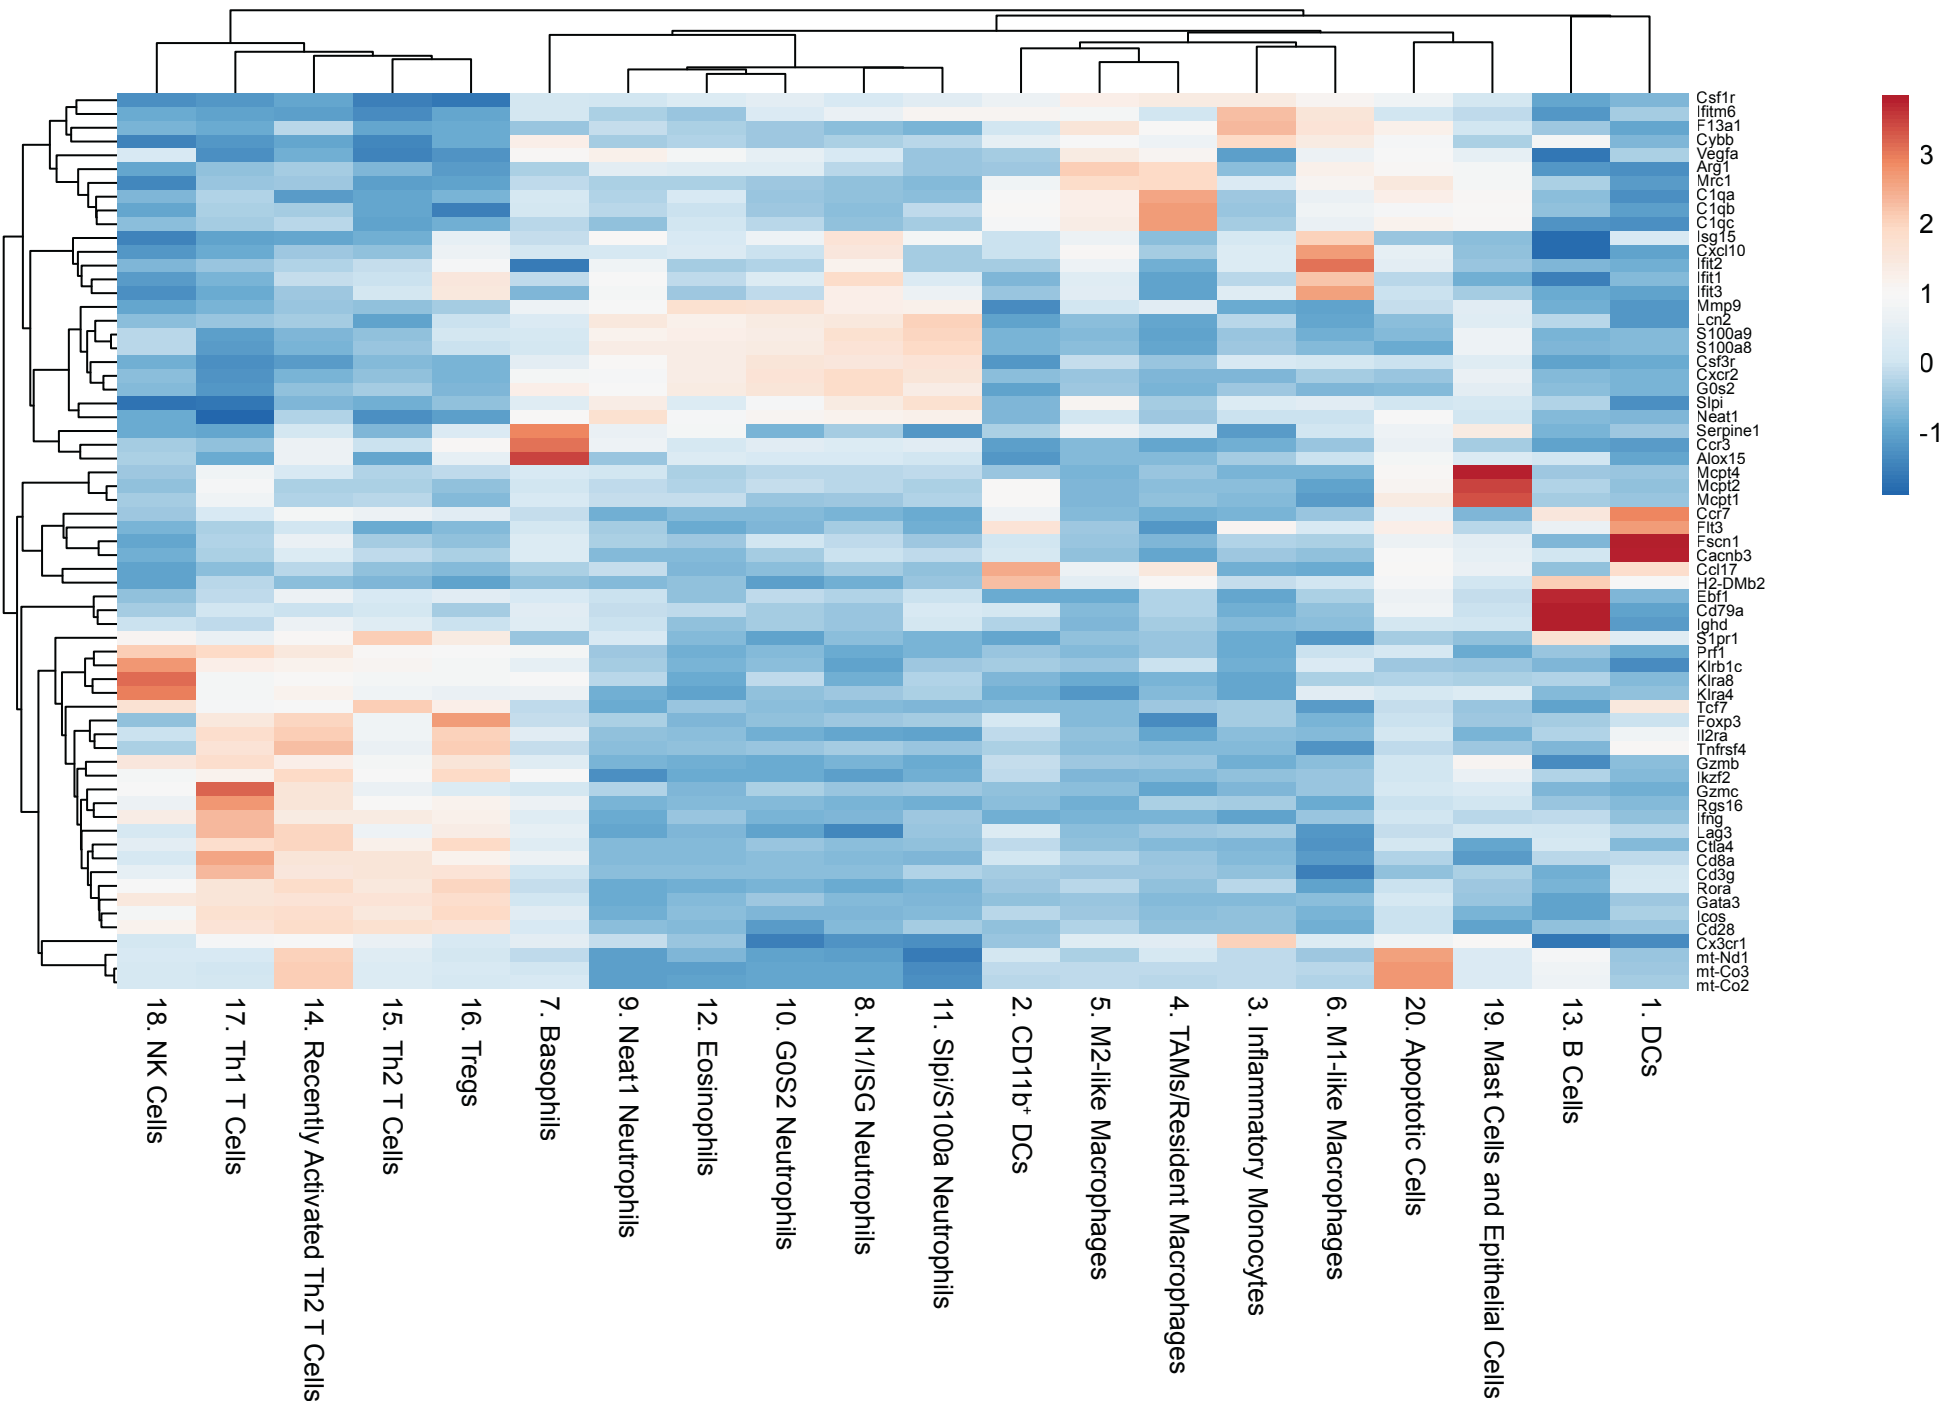



**Supplemental Figure S4. Expression of lineage markers used to identify dominant immune populations in scRNAseq.**

scRNAseq was performed on CD45<sup>+</sup> cells isolated from untreated tumors or 3d post-RT in *Lyz2-Cre/Myd88<sup>fl/fl</sup>* mice and *Myd88<sup>fl/fl</sup>* mice. Unsupervised hierarchical clustering of differential gene expression of indicated genes using ClustVis is shown (see also **Figure 3** and **Supplemental Figure S3**).

**A**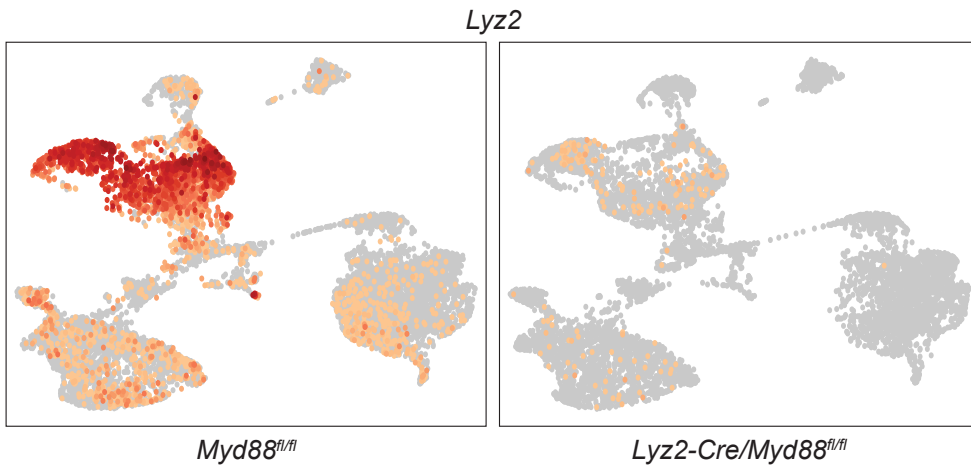**B**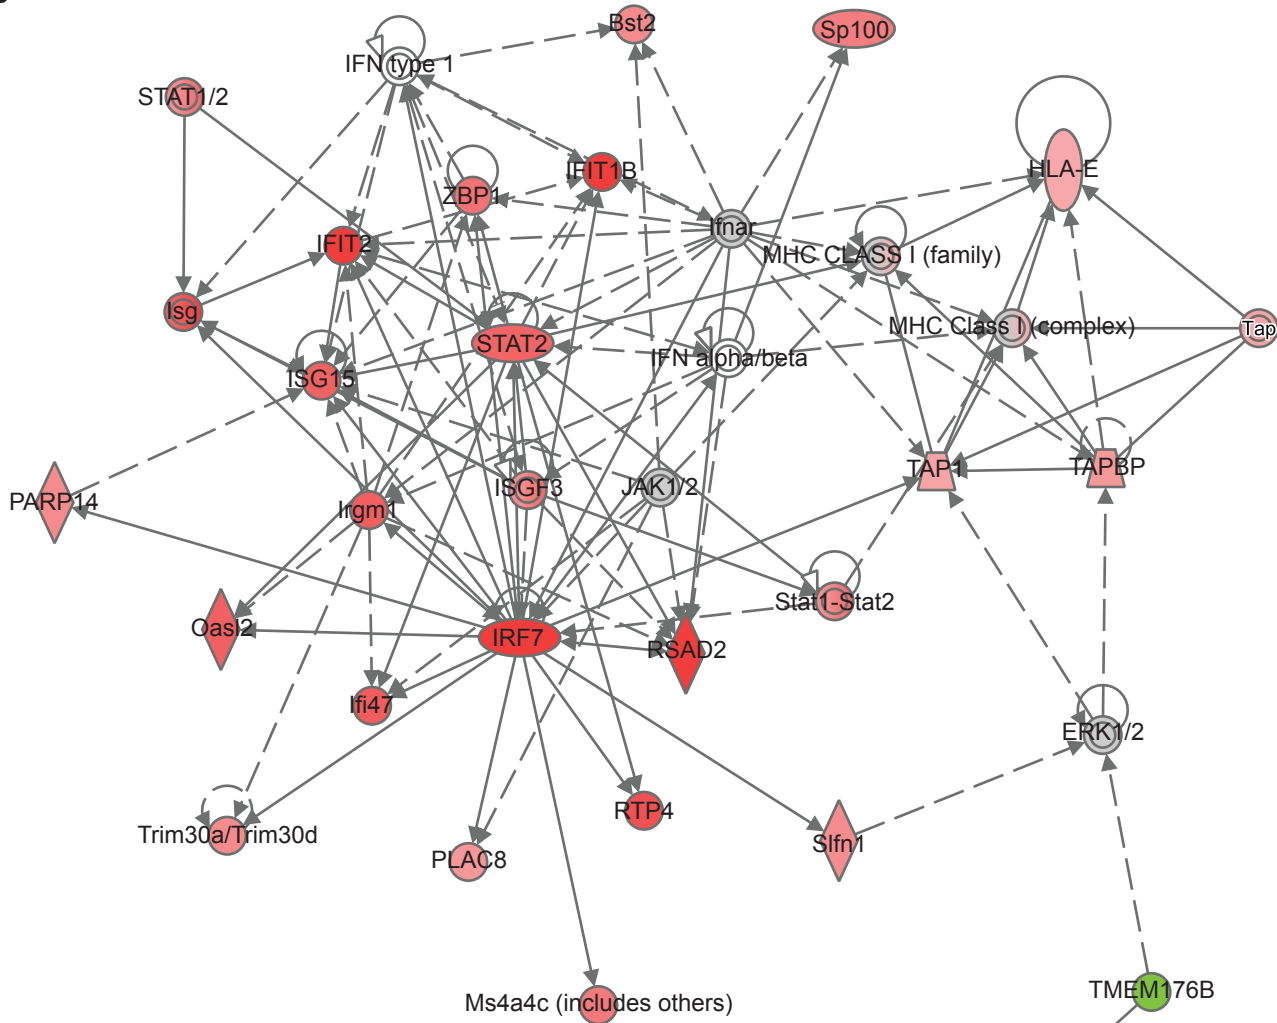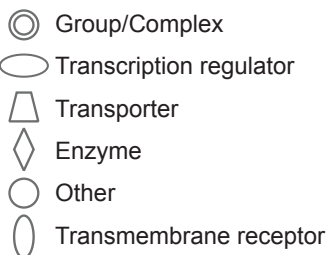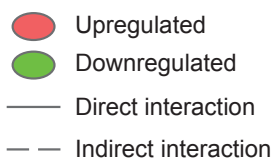

**Supplemental Figure S5. Enhanced interferon responses characterize infiltrating macrophages and monocytes in tumors from *Lyz2-Cre/Myd88<sup>fl/fl</sup>* mice.**

**(A)** UMAP of *Lyz2* expression in *Lyz2-Cre/Myd88<sup>fl/fl</sup>* mice and *Myd88<sup>fl/fl</sup>* mice. **(B)** IPA Network analysis of significant differentially regulated genes in *Lyz2-Cre/Myd88<sup>fl/fl</sup>* mice compared to *Myd88<sup>fl/fl</sup>* mice. Genes upregulated in *Lyz2-Cre/Myd88<sup>fl/fl</sup>* mice are depicted in red, while genes upregulated in *Myd88<sup>fl/fl</sup>* mice are depicted in green, with color intensity associated with degree of upregulation. Chosen network consists of the top scoring network (score = 52). Significance of differential gene expression was defined as fold change >1.5 and  $p < 0.1$ .

**A**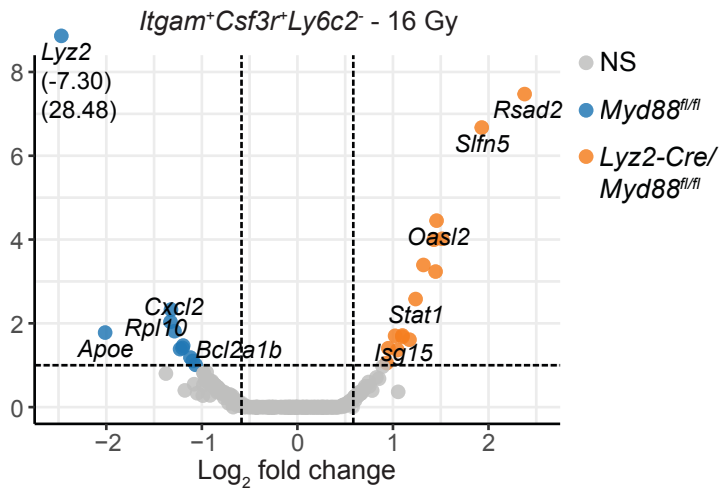**B**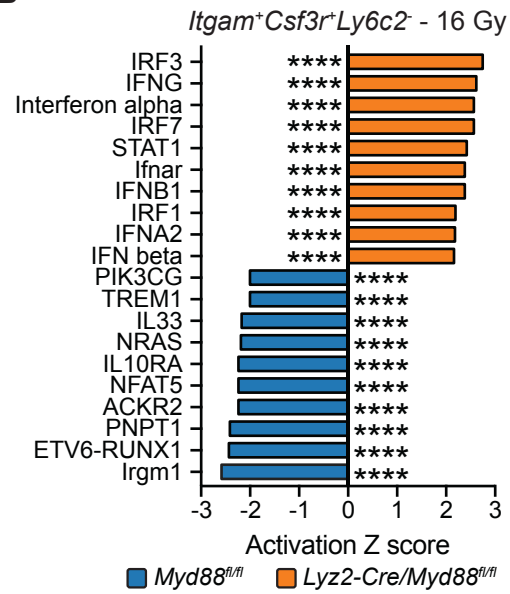**C**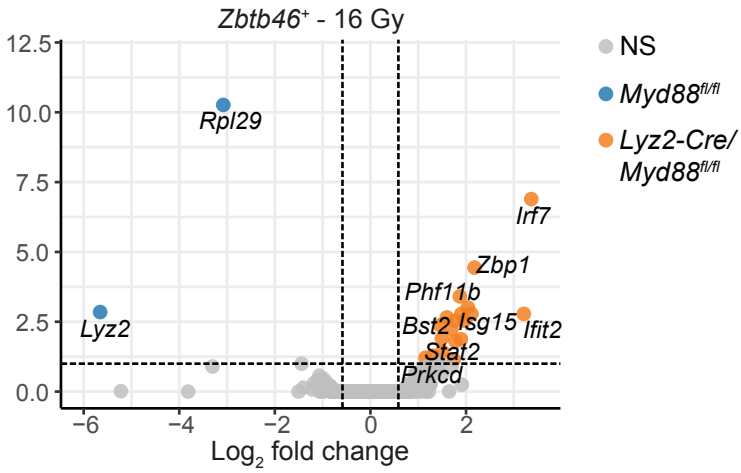**D**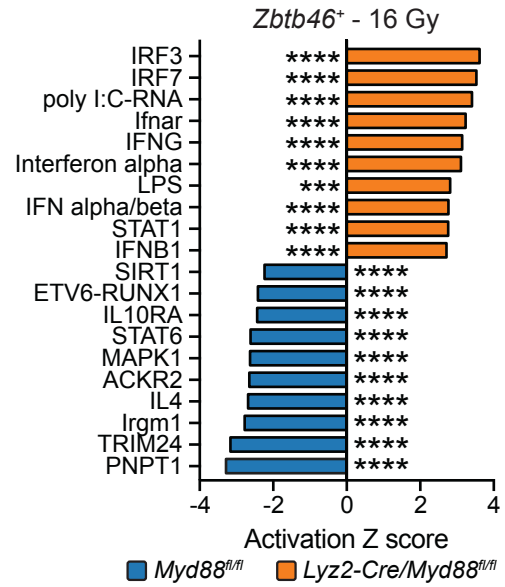

**Supplemental Fig. S6. Enhanced interferon responses characterize granulocytes and dendritic cells in tumors from *Lyz2-Cre/Myd88<sup>fl/fl</sup>* mice.**

**(A)** Volcano plot of differential gene expression in granulocytes (*Itgam<sup>+</sup>Csf3r<sup>+</sup>Ly6c2<sup>+</sup>* cells) that are upregulated in *Lyz2-Cre/Myd88<sup>fl/fl</sup>* mice (right, orange) or upregulated in *Myd88<sup>fl/fl</sup>* mice (left, blue). **(B)** Upstream analysis *Itgam<sup>+</sup>Csf3r<sup>+</sup>Ly6c2<sup>+</sup>* cells granulocytes using Ingenuity Pathway Analysis identifying likely regulators of increased differential gene expression observed in *Lyz2-Cre/Myd88<sup>fl/fl</sup>* mice (top, orange) or *Myd88<sup>fl/fl</sup>* mice (bottom, blue). **(C)** Volcano plot of differential gene expression in dendritic cells (*Zbtb46<sup>+</sup>* cells) that are upregulated in *Lyz2-Cre/Myd88<sup>fl/fl</sup>* mice (right, orange) or upregulated in *Myd88<sup>fl/fl</sup>* mice (left, blue). **(D)** Upstream analysis *Zbtb46<sup>+</sup>* using Ingenuity Pathway Analysis identifying likely regulators of increased differential gene expression observed in *Lyz2-Cre/Myd88<sup>fl/fl</sup>* mice (top, orange) or *Myd88<sup>fl/fl</sup>* mice (bottom, blue). Significance of differential gene expression in **(A-D)** was defined as fold change >1.5 and  $p < 0.1$ . \*\*\*\*  $p < 0.0001$ .

**A**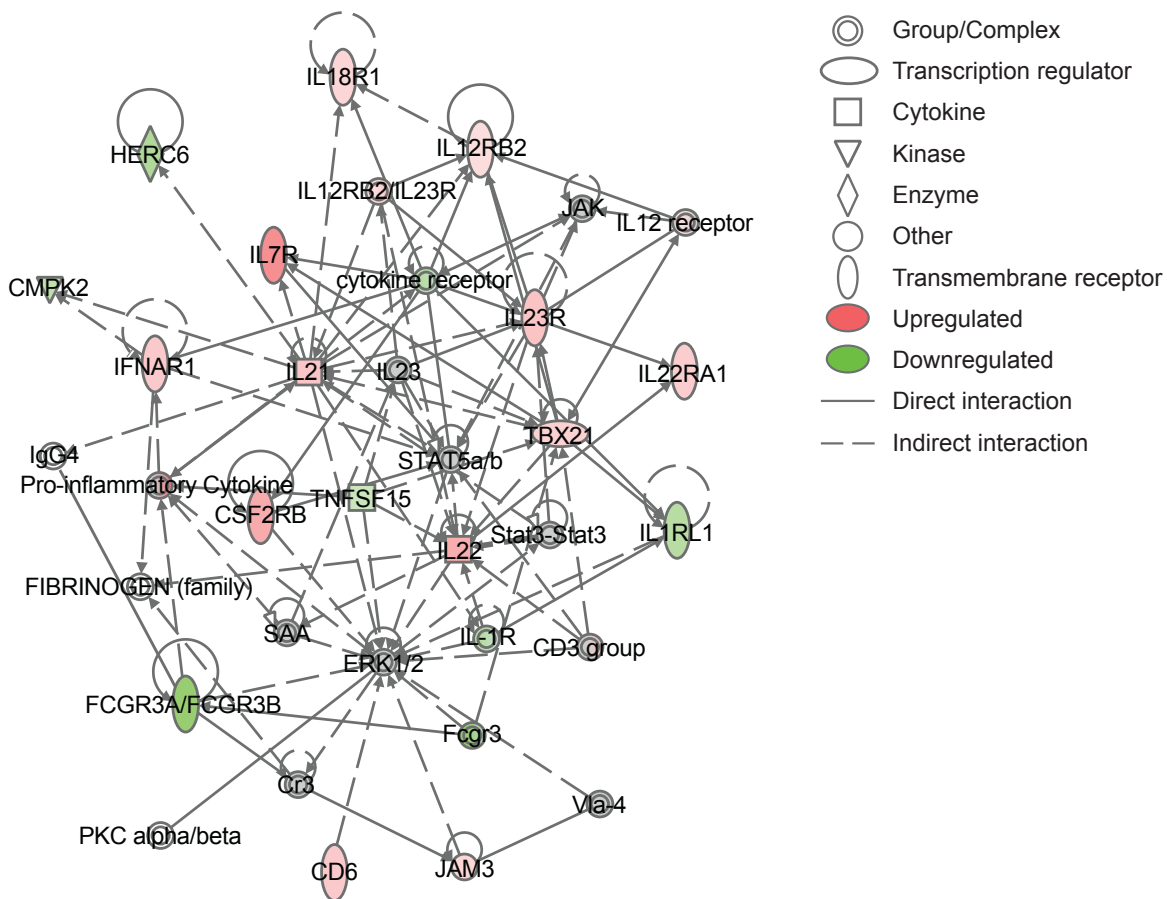**B**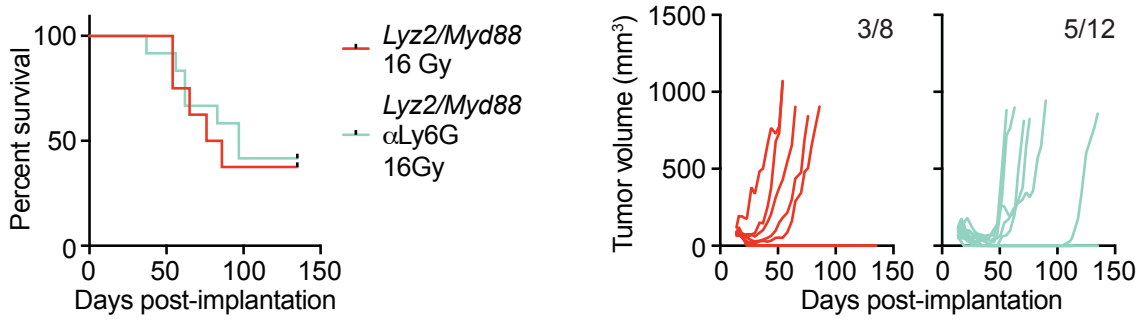**C**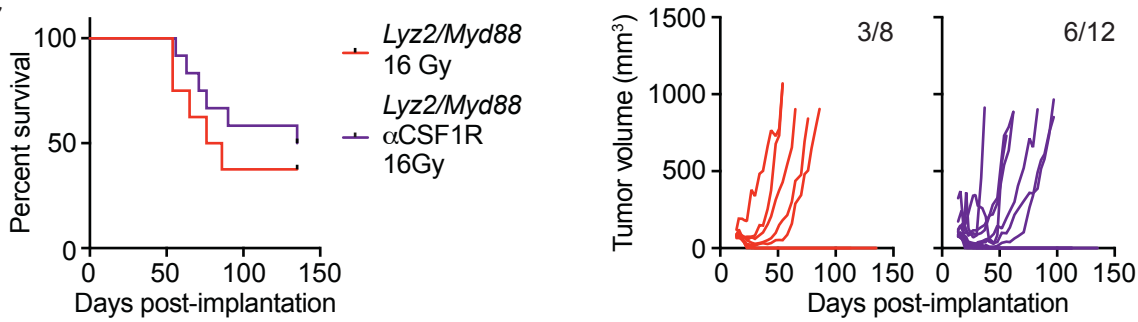**D**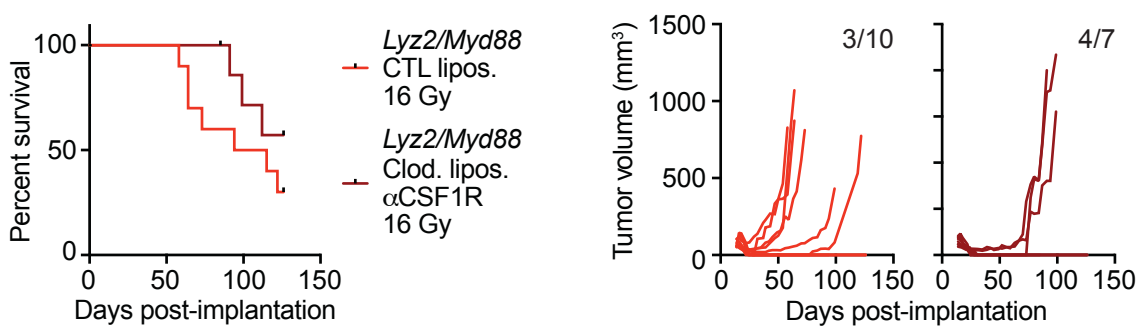

**Supplemental Figure S7. Depletion of Macrophages or Granulocytes does not reverse efficacy of RT in *Lyz2-Cre/Myd88<sup>fl/fl</sup>* mice.**

**(A)** IPA network analysis of significantly differentially regulated genes identified using the PanCancer Immune Profiling gene set by NanoString. Genes upregulated in *Lyz2-Cre/Myd88<sup>fl/fl</sup>* mice are depicted in red, while genes upregulated in *Myd88<sup>fl/fl</sup>* mice are depicted in green, with color intensity associated with degree of upregulation. Chosen network consists of the top scoring network (score = 37). **(B)** Survival curves (left) and individual Panc02-SIY tumor growth curves (right) in control *Lyz2-Cre/Myd88<sup>fl/fl</sup>* mice treated with 16 Gy RT or depleted of granulocytes with  $\alpha$ Ly6G (n = 8-12 mice per group). **(C)** Survival curves (left) and individual Panc02-SIY tumor growth curves (right) in control *Lyz2-Cre/Myd88<sup>fl/fl</sup>* mice treated with 16 Gy RT or depleted of macrophages with  $\alpha$ CSF1R (n = 8-12 mice per group). **(D)** Survival curves (left) and individual Panc02-SIY tumor growth curves (right) in control *Lyz2-Cre/Myd88<sup>fl/fl</sup>* mice treated with 16 Gy RT and control liposomes or depleted of macrophages with  $\alpha$ CSF1R and clodronate liposomes (n = 7-10 mice per group). Significance of differentially regulated genes in **(A)** was defined as fold change >1.5 and p < 0.1. Numbers in the upper right of individual tumor growth curves in **(B-D)** represent the proportion of mice cured by RT. Significance in **(B-D)** was assessed log-rank test.
